# Supplementary material
Source: MDPI journal article supplement (https://www.mdpi.com/2227-9040/9/8/219)
Supplement: s1 [file s1]

## Supplementary Materials

# UV-Light-Driven Enhancement of Peroxidase-Like Activity of Mg-Aminoclay-Based $\text{Fe}_3\text{O}_4/\text{TiO}_2$ Hybrids for Colorimetric Detection of Phenolic Compounds

Yoon Jung Jang†, Vu Khac Hoang Bui†, Phuong Thy Nguyen, Young-Chul Lee\* and Moon Il Kim\*

Department of BioNano Technology, Gachon University, Seongnam, Gyeonggi 13120, Republic of Korea; vsjjer@naver.com (Y.J.J.); hoangvu210190@gmail.com (V.K.H.B.); nnphuongthy18@gmail.com (P.T.N.)

\* Correspondence: dreamdb@gachon.ac.kr (Y.-C.L.), Tel.: +82-31-750-8751; moonil@gachon.ac.kr (M.I.K.), Tel.: +82-31-750-8563

†These authors contributed equally to this work

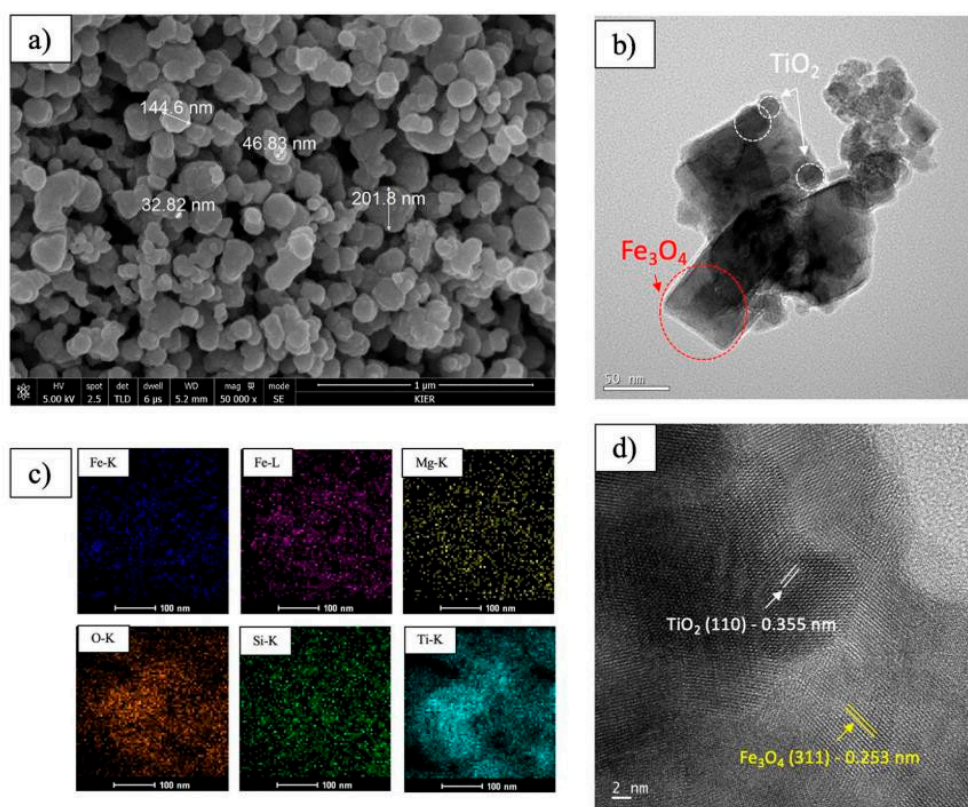

**Figure S1.** (a) SEM, (b) TEM, (c) EDX analysis, and (d) HRTEM of MgAC- $\text{Fe}_3\text{O}_4/\text{TiO}_2$ . Reprinted with permission from Bui et al. (2019) [28]. Copyright 2019, Springer Nature.

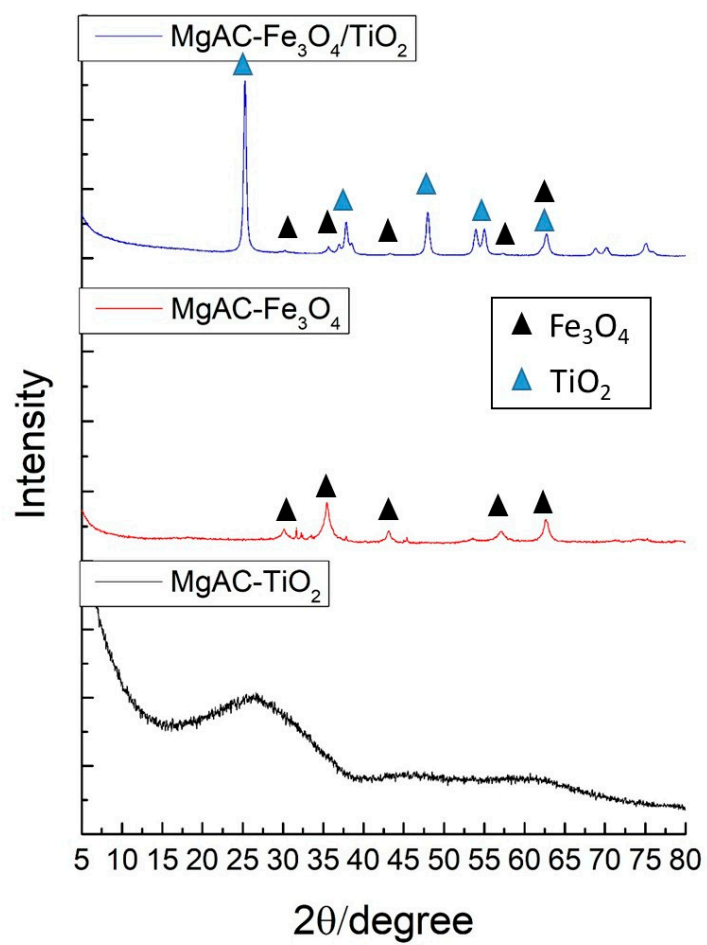

**Figure S2.** XRD patterns for MgAC-Fe<sub>3</sub>O<sub>4</sub>/TiO<sub>2</sub>, MgAC-Fe<sub>3</sub>O<sub>4</sub>, and MgAC-TiO<sub>2</sub>.

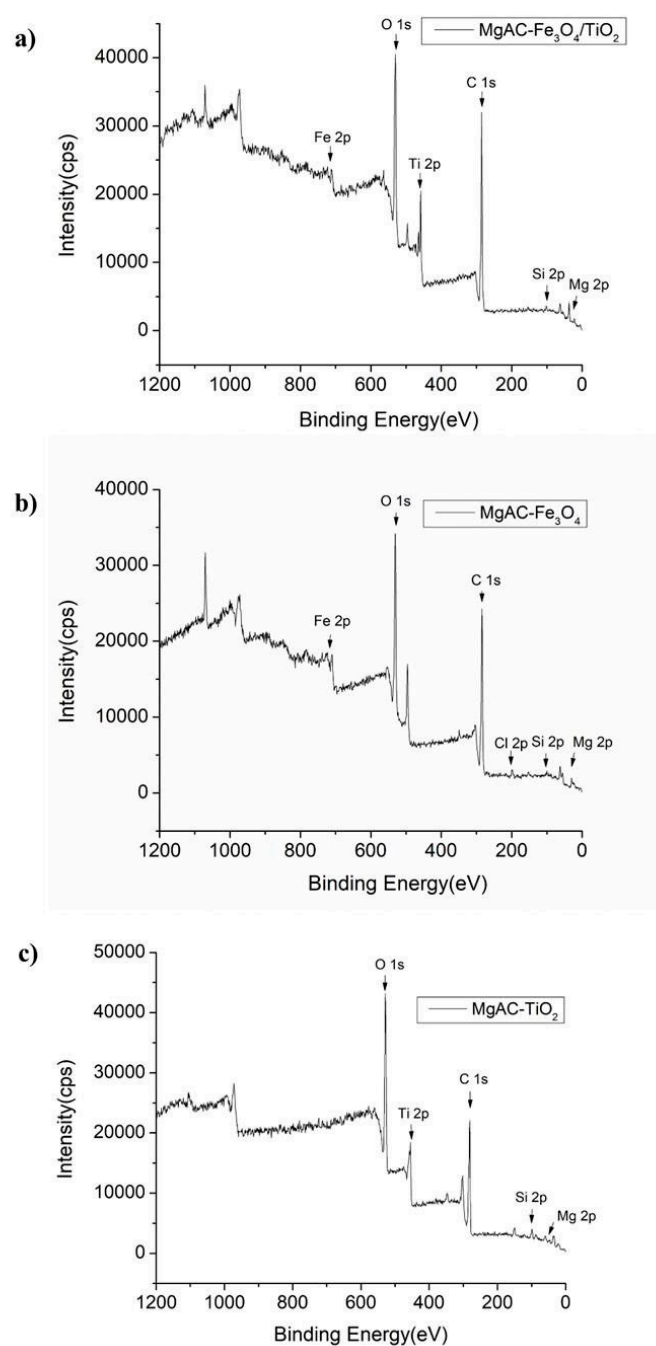

**Figure S3.** XPS full-survey spectra for (a) MgAC-Fe<sub>3</sub>O<sub>4</sub>/TiO<sub>2</sub>, (b) MgAC-Fe<sub>3</sub>O<sub>4</sub>, and (c) MgAC-TiO<sub>2</sub>.

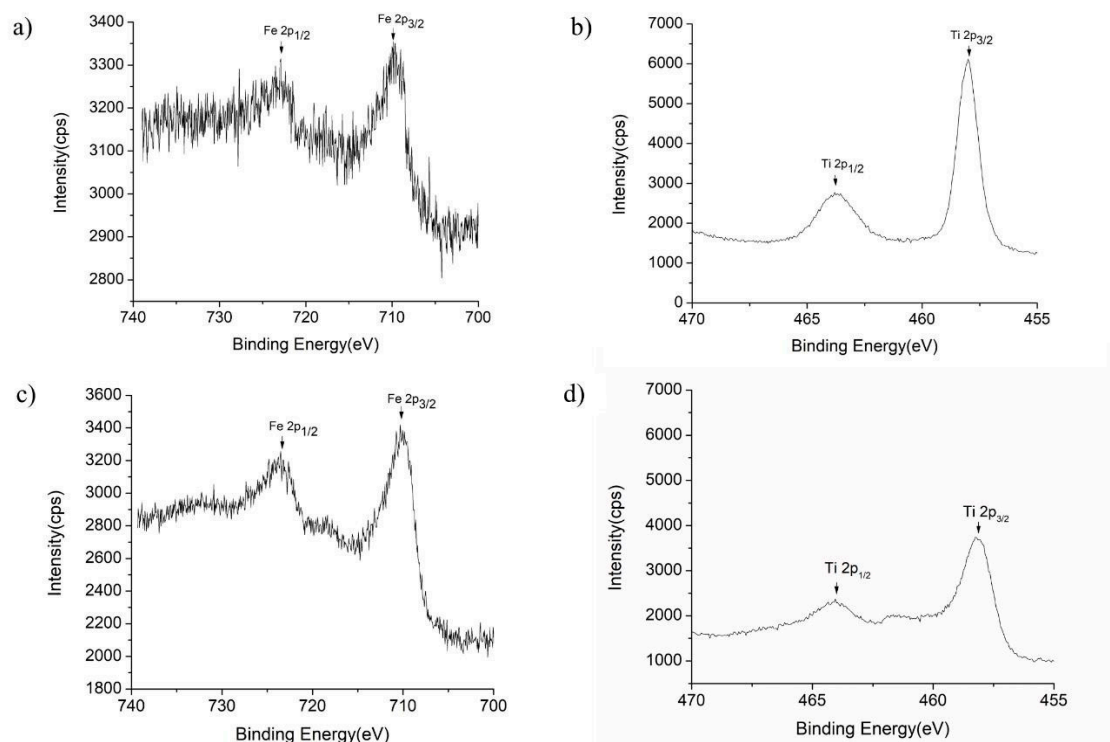

**Figure S4.** XPS spectra for (a) Fe 2p and (b) Ti 2p of MgAc-Fe<sub>3</sub>O<sub>4</sub>/TiO<sub>2</sub>; (c) Fe 2p of MgAc-Fe<sub>3</sub>O<sub>4</sub>; and (d) Ti 2p of MgAc-TiO<sub>2</sub>.

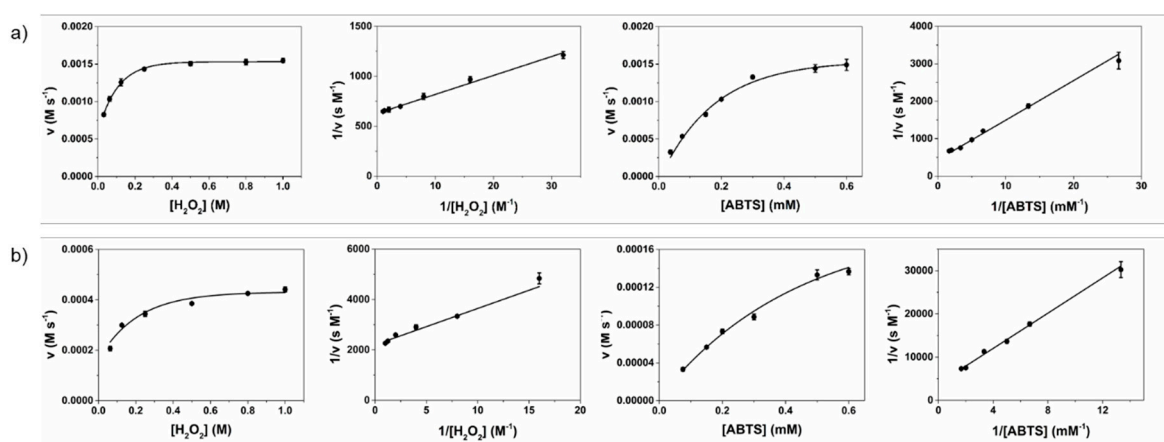

**Figure S5.** Steady-state kinetic assays of MgAc-Fe<sub>3</sub>O<sub>4</sub>/TiO<sub>2</sub> for H<sub>2</sub>O<sub>2</sub> and ABTS in the (a) presence and (b) absence of UV-light irradiation, and their corresponding Lineweaver-Burk plots.

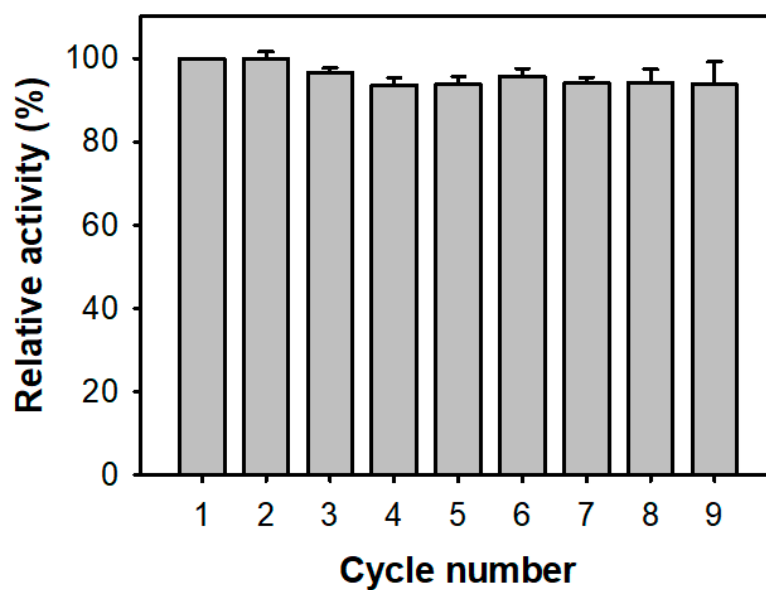

**Figure S6.** Reusability of MgAc-Fe<sub>3</sub>O<sub>4</sub>/TiO<sub>2</sub> hybrid for pyrocatechol determination.

**Table S1.** Kinetic parameters of MgAc-Fe<sub>3</sub>O<sub>4</sub>/TiO<sub>2</sub> with and without UV-light irradiation.

| Conditions                   | Substrate                     | $K_m$ (mM <sup>-1</sup> ) | $V_{max}$ (×10 <sup>-8</sup> M s <sup>-1</sup> ) |
|------------------------------|-------------------------------|---------------------------|--------------------------------------------------|
| With UV-light irradiation    | ABTS                          | 0.20                      | 0.186                                            |
|                              | H <sub>2</sub> O <sub>2</sub> | 28.80                     | 0.145                                            |
| Without UV-light irradiation | ABTS                          | 0.56                      | 0.025                                            |
|                              | H <sub>2</sub> O <sub>2</sub> | 76.01                     | 0.043                                            |

**Table S2.** Comparison of CVs and recovery values of MgAc-Fe<sub>3</sub>O<sub>4</sub>/TiO<sub>2</sub>-based assay for phenolic compounds with those of previous nanomaterial-based strategies.

| Method           | Material                                              | CV (%)    | Recovery (%) | References |
|------------------|-------------------------------------------------------|-----------|--------------|------------|
| Electrochemistry | NaOH nanorods/GCE                                     | 0.57-2.85 | 85.1-99.5    | [S1]       |
| Electrochemistry | AuNPs@MoS <sub>2</sub> -rGO                           | 3.4-5.2   | 92.4-105.2   | [S2]       |
| Fluorometry      | Si CNPs                                               | 1.2-6.9   | 92.5-101.0   | [S3]       |
| Colorimetry      | ssDNA-AuNPs                                           | 1.8-7.7   | 95.0-116.0   | [S4]       |
| Colorimetry      | MgAc-Fe <sub>3</sub> O <sub>4</sub> /TiO <sub>2</sub> | 1.08-6.89 | 97.3-108.4   | This work  |

## References

- [S1] Zhang, M.; Ye, J.; Fang, P.; Zhang, Z.; Wang, C.; Wu, G. Facile electrochemical preparation of NaOH nanorods on glassy carbon electrode for ultrasensitive and simultaneous sensing of hydroquinone, catechol and resorcinol. *Electrochim. Acta* **2019**, *317*, 618–627.
- [S2] Ma, G.; Xu, H.; Wu, M.; Wang, L.; Wu, J.; Xu, F. A hybrid composed of MoS<sub>2</sub>, reduced graphene oxide and gold nanoparticles for voltammetric determination of hydroquinone, catechol, and resorcinol. *Microchim. Acta* **2019**, *186*(11), 1–9.
- [S3] Nsanzamahoro, S.; Zhang, Y.; Wang, W.F.; Ding, Y.Z.; Shi, Y.P.; Yang, J.L. Fluorescence “turn-on” of silicon-containing nanoparticles for the determination of resorcinol. *Microchim. Acta* **2021**, *188*(2), 1–9.
- [S4] Zhang, L.P.; Xing, Y.P.; Liu, L.H.; Zhou, X.H.; Shi, H.C. Fenton reaction-triggered colorimetric detection of phenols in water samples using unmodified gold nanoparticles. *Sens. Actuators B Chem.* **2016**, *225*, 593–599.

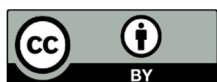

© 2021 by the authors. Submitted for possible open access publication under the terms and conditions of the Creative Commons Attribution (CC BY) license (<http://creativecommons.org/licenses/by/4.0/>).
